# Supplementary material for: Harmonized cross-species cell atlases of trigeminal and dorsal root ganglia
Source: PubMed Central journal article supplement — bioRxiv. 2023 Jul 5:2023.07.04.547740. Preprint. [Version 2] doi: 10.1101/2023.07.04.547740 (PMC10350076; doi:10.1101/2023.07.04.547740), 2023-07-05
Supplement: media-11.pdf [file media-11.pdf]

| Pool name | Sequence                                              |
|-----------|-------------------------------------------------------|
| TRPV1_B1  | <u>gAggAgggCAgCAAACggAATGGCTGCCTCGCTGGCTCACTGCAG</u>  |
| TRPV1_B1  | <u>CTCTCTTTCACGCTTCTCGACCAATTAgAAgAgTCTTCCTTTACg</u>  |
| TRPV1_B1  | <u>gAggAgggCAgCAAACggAAAAAAGAACCTAAACATGAATCCCTT</u>  |
| TRPV1_B1  | <u>CCTCATTCTGTGCAAGTGGTGTCTCCTAgAAgAgTCTTCCTTTACg</u> |
| TRPV1_B1  | <u>gAggAgggCAgCAAACggAATCAATGGCAATGTGCAGCGCCGTCT</u>  |
| TRPV1_B1  | <u>AGTTGCACCAGGTACATGTTCTCCTAgAAgAgTCTTCCTTTACg</u>   |
| TRPV1_B1  | <u>gAggAgggCAgCAAACggAATGGACGTCGGCCCCGTGCTGGATCA</u>  |
| TRPV1_B1  | <u>CTGAAGAATTCTCCATCTGCCCTGGTAgAAgAgTCTTCCTTTACg</u>  |
| TRPV1_B1  | <u>gAggAgggCAgCAAACggAATAAAAGCCTGGCTTTCCTTTAAGCT</u>  |
| TRPV1_B1  | <u>GCAAGGGAGAGAGGAAGTTCACCAATAgAAgAgTCTTCCTTTACg</u>  |
| TRPV1_B1  | <u>gAggAgggCAgCAAACggAAACGATGTCAATCTGGTTGGTGCAGG</u>  |
| TRPV1_B1  | <u>TGGTACGGTTCTGCAGGAGGTACTTAgAAgAgTCTTCCTTTACg</u>   |
| TRPV1_B1  | <u>gAggAgggCAgCAAACggAAGAATCCTTGGTGGTGATGTTGGCCG</u>  |
| TRPV1_B1  | <u>AAGGCATGAAAGACGGTGTTCCTTTAgAAgAgTCTTCCTTTACg</u>   |
| TRPV1_B1  | <u>gAggAgggCAgCAAACggAATCTTTGGTGTGTCAGCAATGTCCA</u>   |
| TRPV1_B1  | <u>TACATCTGGTCACAAACTTTGTGTTAgAAgAgTCTTCCTTTACg</u>   |
| TRPV1_B1  | <u>gAggAgggCAgCAAACggAATCAAGGTGGGGTTAATCTTTGCCCC</u>  |
| TRPV1_B1  | <u>CTTCTTGTTTCGTAATCTCCTCCATTAgAAgAgTCTTCCTTTACg</u>  |
| TRPV1_B1  | <u>gAggAgggCAgCAAACggAATTGCAGCAAGGGTTAAGGGAGTGAG</u>  |
| TRPV1_B1  | <u>ATGCAAAGACCCCGATCTTGCCTGTTAgAAgAgTCTTCCTTTACg</u>  |
| TRPV1_B1  | <u>gAggAgggCAgCAAACggAAGATCCTTGATCTCCCTCCGCAGTAT</u>  |
| TRPV1_B1  | <u>ACTTGCGAGACAGATGCCTGCACTCTAgAAgAgTCTTCCTTTACg</u>  |
| TRPV1_B1  | <u>gAggAgggCAgCAAACggAAGCACAGGTCCATAGGCCCACTCTGT</u>  |
| TRPV1_B1  | <u>CACAAGACAGATCATAGAGGGACGATAgAAgAgTCTTCCTTTACg</u>  |
| TRPV1_B1  | <u>gAggAgggCAgCAAACggAAGCACAGAGTTGTTCTCGTATGTGTC</u>  |
| TRPV1_B1  | <u>TCTCACTACTGTAGGCGATGATCTCTAgAAgAgTCTTCCTTTACg</u>  |
| TRPV1_B1  | <u>gAggAgggCAgCAAACggAACCAGCACCATGTCATGACGATTCGG</u>  |
| TRPV1_B1  | <u>CCTGCAGCAACCGGTTGAGGGGTTCTAgAAgAgTCTTCCTTTACg</u>  |
| TRPV1_B1  | <u>gAggAgggCAgCAAACggAATGCGCTTGACAAATCGGTCCCCTT</u>   |
| TRPV1_B1  | <u>TGTACACTAGGAAGTTGAAGTAGAATAgAAgAgTCTTCCTTTACg</u>  |

|          |                                                       |
|----------|-------------------------------------------------------|
| TRPV1_B1 | <u>gAggAgggCAgCAAACggAACGATGGTGAACAATCATGTATGC</u>    |
| TRPV1_B1 | <u>TTCCATCCACAGGCCTATAGTAGGCTAgAAgAgTCTTCCTTTACg</u>  |
| TRPV1_B1 | <u>gAggAgggCAgCAAACggAATTGAATGCTCAATTGGGAAGGGAGG</u>  |
| TRPV1_B1 | <u>CTCCAGCGTAGCGCAGATAAGCGTCTAgAAgAgTCTTCCTTTACg</u>  |
| TRPV1_B1 | <u>gAggAgggCAgCAAACggAAAGATTCTCCGATCACAGTGGTGAT</u>   |
| TRPV1_B1 | <u>AATATTGAATCCCTCGGATGAAGAATAgAAgAgTCTTCCTTTACg</u>  |
| TRPV1_B1 | <u>gAggAgggCAgCAAACggAATCTTCAGAGAAGGGCGCCTTTGCAC</u>  |
| TRPV1_B1 | <u>CCTCACTGTAGCTGTCAATGAACAATAgAAgAgTCTTCCTTTACg</u>  |
| TRPV1_B1 | <u>gAggAgggCAgCAAACggAAGGAACACCGACTGCACAAAGAACAG</u>  |
| TRPV1_B1 | <u>TGAAGTACAGCACCACCGCCGTCAGTAgAAgAgTCTTCCTTTACg</u>  |
| TRPV1_B1 | <u>gAggAgggCAgCAAACggAAGGGAGCCCACATACTCCTGCATGCC</u>  |
| TRPV1_B1 | <u>CCCAACTCAGAGACAAGCACATGACTAgAAgAgTCTTCCTTTACg</u>  |
| TRPV1_B1 | <u>gAggAgggCAgCAAACggAAATCCGCGAGTGTAGTACAGCATGTT</u>  |
| TRPV1_B1 | <u>TGACTGAGTAGATGCCCATCACCTGTAgAAgAgTCTTCCTTTACg</u>  |
| TRPV1_B1 | <u>gAggAgggCAgCAAACggAAAATCTCTCAGGATCATCTTCTCAAT</u>  |
| TRPV1_B1 | <u>CACTGTAAACAAACATGAAGCGCAATAgAAgAgTCTTCCTTTACg</u>  |
| TRPV1_B1 | <u>gAggAgggCAgCAAACggAAAAGCTGCAGCAAATCCAAAGAGGAA</u>  |
| TRPV1_B1 | <u>ATTCGCCGTCCTCAATCAGGGTACTAgAAgAgTCTTCCTTTACg</u>   |
| TRPV1_B1 | <u>gAggAgggCAgCAAACggAAGCGACGGTGAGCTGCTTTCACCGAC</u>  |
| TRPV1_B1 | <u>AGCTGGGAAAATAGCTTCCTTCATTTAgAAgAgTCTTCCTTTACg</u>  |
| TRPV1_B1 | <u>gAggAgggCAgCAAACggAACCCACGTCTTGTGGCCAGAGCC</u>     |
| TRPV1_B1 | <u>TGTAGGACTCCGGACCCTTTGCATAgAAgAgTCTTCCTTTACg</u>    |
| TRPV1_B1 | <u>gAggAgggCAgCAAACggAAAGTTCTCAGTGAAGTCCAAGTCCCC</u>  |
| TRPV1_B1 | <u>GAAAGATGAAGATGGGCTTGAATCGTAgAAgAgTCTTCCTTTACg</u>  |
| TRPV1_B1 | <u>gAggAgggCAgCAAACggAAATGTCATGATGACGTACACAACCAA</u>  |
| TRPV1_B1 | <u>CAATGAGCATGTTGAGCAGCAGGATTAgAAgAgTCTTCCTTTACg</u>  |
| TRPV1_B1 | <u>gAggAgggCAgCAAACggAATTTTGCTCACGGTCTCACCCATGAG</u>  |
| TRPV1_B1 | <u>TCCAGATGCTCTTGCTTTCCTGCGCTAgAAgAgTCTTCCTTTACg</u>  |
| TRPM8_B2 | <u>ACAGCTCAAGAACTTCTTCAGTTCAAATCATCCAgTAAACCgCC</u>   |
| TRPM8_B2 | <u>CCTCgTAAATCCTCATCAAACCTCTGAATAAAGCTCAGTGAGCACC</u> |

|          |                                                |
|----------|------------------------------------------------|
| TRPM8_B2 | GTTCCGGAACACCAGGGCGCTGAAGAAATCATCCAgTAAACCgCC  |
| TRPM8_B2 | CCTCgTAAATCCTCATCAAAGTTGTATGAGTTCTTGGCGATGTGC  |
| TRPM8_B2 | CTCCACACGAAGGTGAGCAGTGTGAAATCATCCAgTAAACCgCC   |
| TRPM8_B2 | CCTCgTAAATCCTCATCAAACCTTGCTTCTCTGGAAGTTGGTGACC |
| TRPM8_B2 | GCCATCCTTCATGCTGTCATCTTCCAAATCATCCAgTAAACCgCC  |
| TRPM8_B2 | CCTCgTAAATCCTCATCAAAGTAACGTCCTACTATTTGAACTTCC  |
| TRPM8_B2 | GTGCTTGTGATTGGCGATGCGTCAAAATCATCCAgTAAACCgCC   |
| TRPM8_B2 | CCTCgTAAATCCTCATCAAATGCCAGATGAAGAGGGCTTGTAGC   |
| TRPM8_B2 | GGAGAGCTCCCTTTTGTCTGCAGCAAATCATCCAgTAAACCgCC   |
| TRPM8_B2 | CCTCgTAAATCCTCATCAAATCCTCTGGTCTGTTCCTCAAATGACT |
| TRPM8_B2 | GCTAGCTCCCAGTGCAGCAAGTGTGAAATCATCCAgTAAACCgCC  |
| TRPM8_B2 | CCTCgTAAATCCTCATCAAAGACTTTGGCCAAGCTTCAACAGC    |
| TRPM8_B2 | CTCCCCAGCGGCATTGATATCATTCAAATCATCCAgTAAACCgCC  |
| TRPM8_B2 | CCTCgTAAATCCTCATCAAACCTCATACTCGTTGGCAATTCCTCT  |
| TRPM8_B2 | TTCGCTGAAGAGTTCGACTGCACGGAAATCATCCAgTAAACCgCC  |
| TRPM8_B2 | CCTCgTAAATCCTCATCAAAGCAAGGTCCTCGTCGCTGCTGTAG   |
| TRPM8_B2 | TTCACAGGAATAGACCAGCAGCTGCAAATCATCCAgTAAACCgCC  |
| TRPM8_B2 | CCTCgTAAATCCTCATCAAAGCCAGCTCGAGGCAGTTGCTGCCCC  |
| TRPM8_B2 | ATAAACTGCTGATCTTTTGCTTCCAAAATCATCCAgTAAACCgCC  |
| TRPM8_B2 | CCTCgTAAATCCTCATCAAAGGAAGTTCTGGACTCCTGGCTGTG   |
| TRPM8_B2 | GATATATGGCCATACCACTGCTTGGAATCATCCAgTAAACCgCC   |
| TRPM8_B2 | CCTCgTAAATCCTCATCAAATGATCTTCCAGTTCTTTGTGTCAC   |
| TRPM8_B2 | ATCAGCGGGAGGAAGAGGAGGCACAAAATCATCCAgTAAACCgCC  |
| TRPM8_B2 | CCTCgTAAATCCTCATCAAATCCTGAAGGAGATGAAGCCGCAGC   |
| TRPM8_B2 | TGGGTCTGCTTTCATCCAAGGGCTAAATCATCCAgTAAACCgCC   |
| TRPM8_B2 | CCTCgTAAATCCTCATCAAAGTGATGAAGCCCCGACTTCCACA    |
| TRPM8_B2 | GTCCAGGAGAAGACCACAAACGGTGAAATCATCCAgTAAACCgCC  |
| TRPM8_B2 | CCTCgTAAATCCTCATCAAAGGAGGAAGCCAATGTAGAAAATGG   |
| TRPM8_B2 | TTCATCAGCAGCACGTAGGCGAAGAAAATCATCCAgTAAACCgCC  |
| TRPM8_B2 | CCTCgTAAATCCTCATCAAATCTAGGCCAGTGGGCACGGGCTGGA  |

|          |                                                |
|----------|------------------------------------------------|
| TRPM8_B2 | ACAAAGACCAGCCCATAGACAGAAAAATCATCCAgTAAACCgCC   |
| TRPM8_B2 | CCTCgTAAATCCTCATCAAAACTGTCTGATTCATCACAAGGA     |
| TRPM8_B2 | GTGAAATACTTGATACCGCTCATGTAAATCATCCAgTAAACCgCC  |
| TRPM8_B2 | CCTCgTAAATCCTCATCAAAAGCATGTCCATGATGTTCCACATGT  |
| TRPM8_B2 | ATGCCGGTGATGAAGTACAGGATGCAAATCATCCAgTAAACCgCC  |
| TRPM8_B2 | CCTCgTAAATCCTCATCAAAGGGTTGGATTTATGTAGTCTGAACA  |
| TRPM8_B2 | ATGACCCTCCCTGCGTACAGGGAGCAAATCATCCAgTAAACCgCC  |
| TRPM8_B2 | CCTCgTAAATCCTCATCAAAGTGAAGATAATGTAGTCCAGGCAGA  |
| TRPM8_B2 | ACAGTGAATATGTGGATCAGTCGGAAAATCATCCAgTAAACCgCC  |
| TRPM8_B2 | CCTCgTAAATCCTCATCAAAATGATCTTGGGGCCCAGGTTCCGGC  |
| TRPM8_B2 | ACATCGATTAACATTCTCTGCAGCAAATCATCCAgTAAACCgCC   |
| TRPM8_B2 | CCTCgTAAATCCTCATCAAAACCGCAAAGAGGAACAGGAAGAAGA  |
| TRPM8_B2 | CGAGCCACGCCAAATGCAATCACCCAAATCATCCAgTAAACCgCC  |
| TRPM8_B2 | CCTCgTAAATCCTCATCAAATGCTCGTTCAGCCTCAGGATGCCTT  |
| TRPM8_B2 | ACAGAGCGGAAGATCCACTCCCAGCAAATCATCCAgTAAACCgCC  |
| TRPM8_B2 | CCTCgTAAATCCTCATCAAAAACACGGCCAGATATGGCTCGTAGA  |
| TRPM8_B2 | CCATCAACGTCGGAAGGGTACTGGCAAATCATCCAgTAAACCgCC  |
| TRPM8_B2 | CCTCgTAAATCCTCATCAAAGTGCAGTGCTCGAAATCATAGGTGG  |
| TRPM8_B2 | AGAGGTTTCGACTCATTCCCAGTGAATCATCCAgTAAACCgCC    |
| TRPM8_B2 | CCTCgTAAATCCTCATCAAATGTTTCGTCGGAATCCATCTCCACAC |
| TRPM8_B2 | ATGGTGATCCACTCTGGGAAGCGGGAAATCATCCAgTAAACCgCC  |
| TRPM8_B2 | CCTCgTAAATCCTCATCAAAGACAGCATGTAGATGCACACAAGTG  |
| TRPM8_B2 | AGGAGGTTGACCAGCAGGATGTTGAAATCATCCAgTAAACCgCC   |
| TRPM8_B2 | CCTCgTAAATCCTCATCAAACCAACGGTGACCCAAACATGGCAA   |
| TRPM8_B2 | ACCTGGTCATTGTTCTCTTGACAGAAATCATCCAgTAAACCgCC   |
| TRPM8_B2 | CCTCgTAAATCCTCATCAAAACCAGGAAGTAGCGCTGGAACCTCC  |
| TRPM8_B2 | ATGGTGAGCCGGTTGCACTACTCCTAAATCATCCAgTAAACCgCC  |
| TRPM8_B2 | CCTCgTAAATCCTCATCAAATAGGCGAAGATCACAAACGGGAATG  |
| TRPM8_B2 | AGCATCTTCCTCAGCACCATGAAGAAAATCATCCAgTAAACCgCC  |
| TRPM8_B2 | CCTCgTAAATCCTCATCAAAGGGGCCTCCTCCTCCAGCAGCAGT   |

|          |                                               |
|----------|-----------------------------------------------|
| TRPM8_B2 | TTTCTCGAACAGCATACGGTGGGCTAAATCATCCAgTAAACCgCC |
| TRPM8_B2 | CCTCgTAAATCCTCATCAAATCCCAGGCCAGGGTCTCTGTGTCT  |
| TRPM8_B2 | ATGAGATAGTTCTCTTTCATGACAGAAATCATCCAgTAAACCgCC |
| TRPM8_B2 | CCTCgTAAATCCTCATCAAAGAGTCATTGGCCTTGATGTTGCTTT |
| TRPM8_B2 | CGGAACCGGTGCTCCATCTGCTCCGAAATCATCCAgTAAACCgCC |
| TRPM8_B2 | CCTCgTAAATCCTCATCAAAGGTCGTGCAGCTTGCTCTCCATCT  |
| TRPM8_B2 | CTGGTAATCTCTTTCATGATGCGCTAAATCATCCAgTAAACCgCC |
| TRPA1_B3 | gTCCCTgCCTCTATATCTTTGTAGGATTTAATAGTAATTTAATAC |
| TRPA1_B3 | TTGTGTTGAGGCAAAGATCCAGACCTTCCACTCAACTTTAACCCg |
| TRPA1_B3 | gTCCCTgCCTCTATATCTTCTATTTGTCCAGCGGCATCTCTTTG  |
| TRPA1_B3 | TTGCCTTCTCAGCTGCCCTAACACTTCCACTCAACTTTAACCCg  |
| TRPA1_B3 | gTCCCTgCCTCTATATCTTTTGACTTATGCTATCACTGCAGTCAG |
| TRPA1_B3 | AGTAGCACAGTCAGGCAATCAGGGATTCCACTCAACTTTAACCCg |
| TRPA1_B3 | gTCCCTgCCTCTATATCTTTCCGACGGCCAAACCAATCTCCACAG |
| TRPA1_B3 | GCATTGCGTTGTACTTCTGCAATGTTTCCACTCAACTTTAACCCg |
| TRPA1_B3 | gTCCCTgCCTCTATATCTTTACCTGCATTTCAATTCTTTAAGTG  |
| TRPA1_B3 | TTCTTTTCCAAGCTGGTGTGAAGGTTTCCACTCAACTTTAACCCg |
| TRPA1_B3 | gTCCCTgCCTCTATATCTTTACTCGTTTTAGCAACCAATAAGGCA |
| TRPA1_B3 | GGATAGACAGTTATGGAGGTCTTATTTCCACTCAACTTTAACCCg |
| TRPA1_B3 | gTCCCTgCCTCTATATCTTTGCAACTCCCCAGATTCTTGGCCTGT |
| TRPA1_B3 | ATGAACAGGAGCAAAGGTGAATTGATTCCACTCAACTTTAACCCg |
| TRPA1_B3 | gTCCCTgCCTCTATATCTTTTCTGGTGTGATCCCTCACAAGCAA  |
| TRPA1_B3 | TCCACAGCAGTGTCCGTAGGCGGCATTCCACTCAACTTTAACCCg |
| TRPA1_B3 | gTCCCTgCCTCTATATCTTCTGTGCTTTTGCTTTAAAAGTTCCG  |
| TRPA1_B3 | TGAAGCAGAGAAGACATGTCTTTCATTCCACTCAACTTTAACCCg |
| TRPA1_B3 | gTCCCTgCCTCTATATCTTTATCAGTTTAATTAGTTCATGTTGTT |
| TRPA1_B3 | TCTGAAATAATTTCCATTTTCTGAATTCCACTCAACTTTAACCCg |
| TRPA1_B3 | gTCCCTgCCTCTATATCTTTTGATCCTGCTCCTCCTCATCTTCAg |
| TRPA1_B3 | TTTTGACTTTTGACCTTGCAACTTTTCCACTCAACTTTAACCCg  |
| TRPA1_B3 | gTCCCTgCCTCTATATCTTTTCCATTTGCTGTCTTGGGTTCA    |

|          |                                               |
|----------|-----------------------------------------------|
| TRPA1_B3 | TTTGCTTTGACTGCTTTTAGCACACTTCCACTCAACTTTAACCCg |
| TRPA1_B3 | gTCCCTgCCTCTATATCTTTAACAGTGAGTCTCTGGTTCACACAG |
| TRPA1_B3 | CAATATCTGATTATACTATCAAACATTCCACTCAACTTTAACCCg |
